# Supplementary material
Source: PubMed Central journal article supplement (PMC8727644)
Supplement: NIHMS1712997-supplement-1.pdf [file NIHMS1712997-supplement-1.pdf]

**Supplemental Table 1.** Regression Coefficient of social participation by continuous multimorbidity with interactions by purpose in life and life satisfaction among Health and Retirement Study participants, 2010-2014 and 2012-2016.

| Models                                                                                           | Social Participation Score<br>N=12,825 |                |         |                |
|--------------------------------------------------------------------------------------------------|----------------------------------------|----------------|---------|----------------|
|                                                                                                  | Regression coefficient                 | 95% CI         | P-value | R <sup>2</sup> |
| Unadjusted                                                                                       |                                        |                |         | 0.025          |
| MWI, continuous                                                                                  | -0.39*                                 | (-0.43, -0.34) | <0.001  |                |
| Adjusted <sup>1</sup>                                                                            |                                        |                |         | 0.21           |
| MWI, continuous                                                                                  | -0.19*                                 | (-0.23, -0.14) | <0.001  |                |
| Adjusted <sup>1</sup> with Purpose in Life                                                       |                                        |                |         | 0.27           |
| MWI, continuous                                                                                  | -0.09*                                 | (-0.13, -0.05) | <0.001  |                |
| MWI*Purpose in life                                                                              | 0.11*                                  | (0.07, 0.14)   | <0.001  |                |
| Adjusted <sup>1</sup> with Life Satisfaction                                                     |                                        |                |         | 0.23           |
| MWI, continuous                                                                                  | -0.12*                                 | (-0.16, -0.08) | <0.001  |                |
| MWI*Life satisfaction                                                                            | 0.04*                                  | (0.02, 0.07)   | <0.001  |                |
| Adjusted <sup>1</sup> with Purpose in Life and Life Satisfaction                                 |                                        |                |         | 0.27           |
| MWI, continuous                                                                                  | -0.07*                                 | (-0.11, -0.03) | 0.001   |                |
| MWI*Purpose in life                                                                              | 0.10*                                  | (0.05, 0.13)   | <0.001  |                |
| MWI*Life satisfaction                                                                            | 0.02                                   | (-0.001, 0.05) | 0.065   |                |
| Adjusted <sup>1</sup> with 3-Way Interaction Between Purpose in Life, Life Satisfaction, and MWI |                                        |                |         | 0.27           |
| MWI, continuous                                                                                  | -0.07*                                 | (-0.11, -0.03) | <0.001  |                |
| MWI*Purpose in life                                                                              | 0.11*                                  | (0.07, 0.15)   | <0.001  |                |
| MWI*Life satisfaction                                                                            | 0.03*                                  | (0.01, 0.04)   | 0.014   |                |
| MWI*Purpose in life*Life satisfaction                                                            | 0.02*                                  | (0.01, 0.04)   | 0.005   |                |

Abbreviations: MWI, multimorbidity-weighted index; CI, confidence interval

<sup>1</sup>Adjusted for age, sex, education, household net worth, race/ethnicity, marital status, employment status, and calendar time.
